# Supplementary material for: Finite size effects on the metamagnetic phase transition in a thick B2 FeRh nanocluster film
Source: Royal Society of Chemistry journal article supplement (doi:10.1039/d4nr00873a), 2024-01-01
Supplement: d4nr00873a1.pdf [file d4nr00873a1.pdf]

# Finite size effects on the metamagnetic phase transition in a thick B2 FeRh nanocluster film

Here are presented figures as Electronic Supplementary Information.

## 1. TEM/EDX IN CROSS SECTION

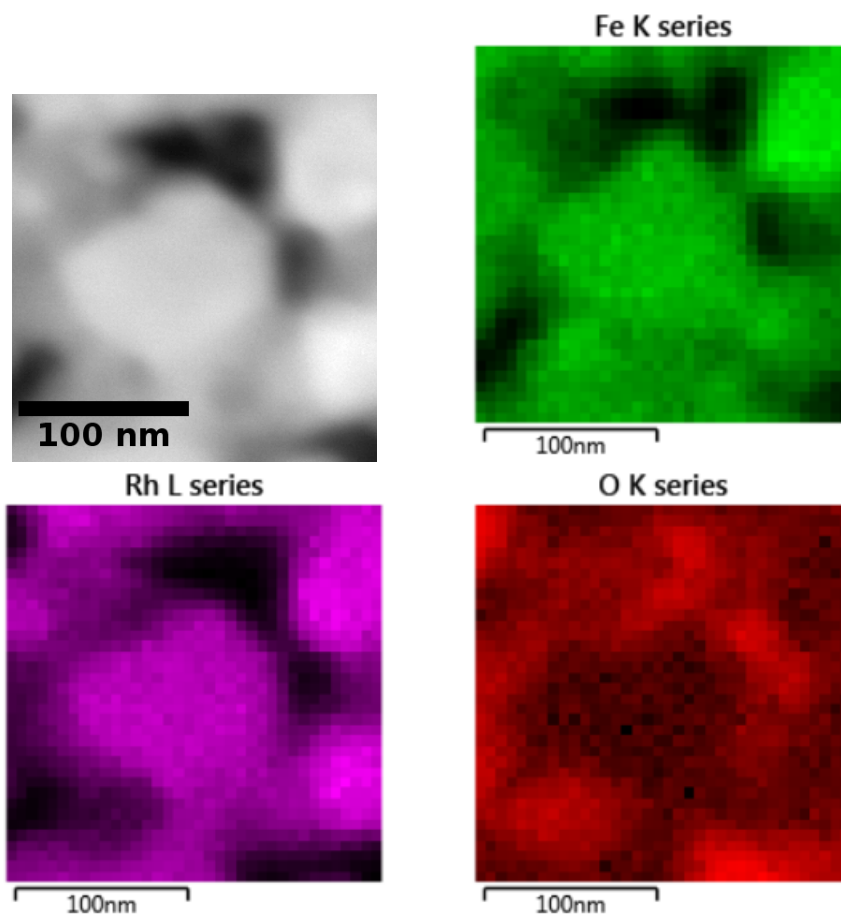

**Fig. S1.** TEM/EDX map performed on the annealed FeRh thick sample in cross section: TEM (white) and EDX maps for Fe (green), Rh (purple) and O (red) over a FeRh nanocluster assembled lamella

## 2. RBS

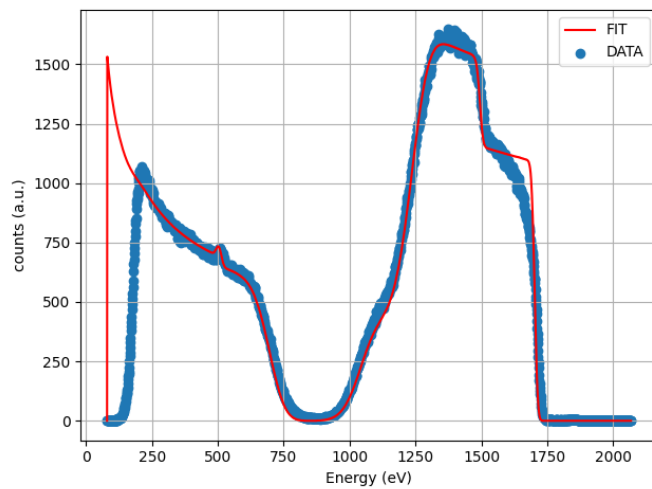

**Fig. S2.** Rutherford back-scattering spectroscopy for the annealed FeRh thick film over Si substrate: experimental (blue) and the respective fit (red)

### 3. HARD X-RAY ABSORPTION SPECTROSCOPY: XAS/XMCD BEFORE AND AFTER ANNEALING

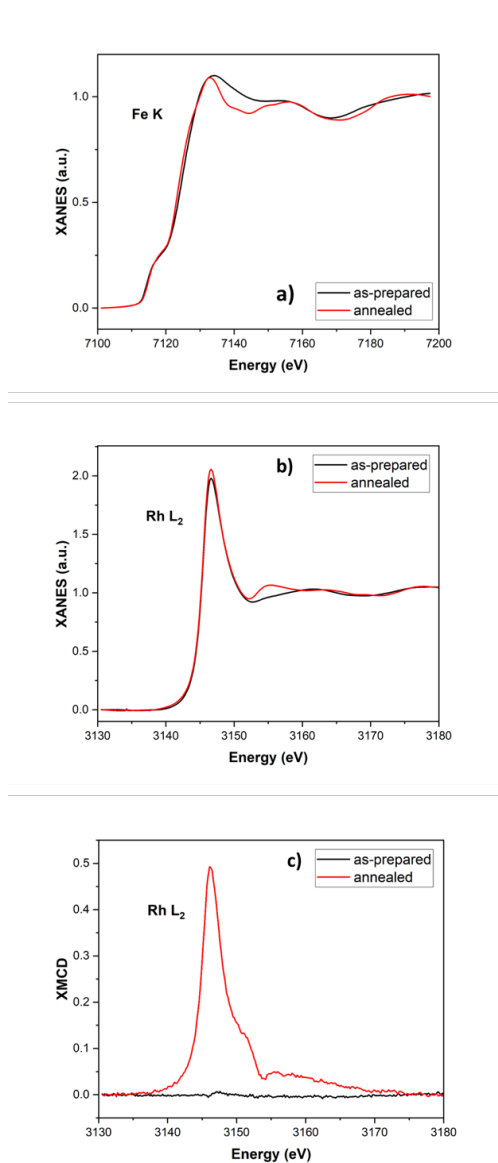

**Fig. S3.** Hard X-ray absorption spectroscopy (XAS) of the FeRh thick sample at Fe  $K$  edge (a) and at the Rh  $L_2$  edge under 7 Tesla at 320K (b) before (black) and after annealing (red) revealing two different crystallographic signatures, characteristic of a chemically disordered FCC A1 alloyed phase and a chemically ordered CsCl B2 alloyed FeRh phase, respectively. XMCD corresponding signal at the Rh  $L_2$  edge under 7 Tesla at 320K (c) before (black) and after annealing (red)

**4. SOFT X-RAY ABSORPTION SPECTROSCOPY: XAS/XMCD IN TEY ON ANNEALED SAMPLE BEFORE REDUCTION**

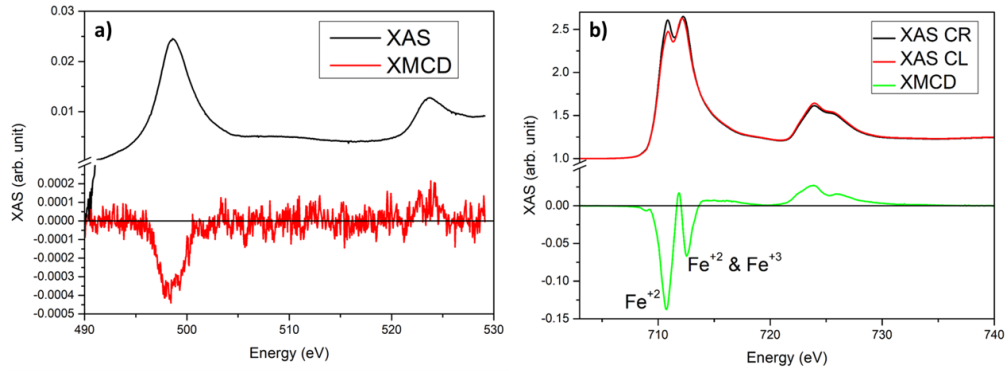

**Fig. S4.** Soft X-ray absorption spectroscopy (XAS) and X-ray magnetic circular dichroism (XMCD) obtained on the annealed FeRh thick sample before reduction, at the Rh  $M_{2,3}$  (a) edge and at the Fe  $L_{2,3}$  (b) at room temperature and under 1.5 T.

**5. SOFT X-RAY ABSORPTION SPECTROSCOPY: XMCD IN TFY ON ANNEALED SAMPLE AFTER REDUCTION**

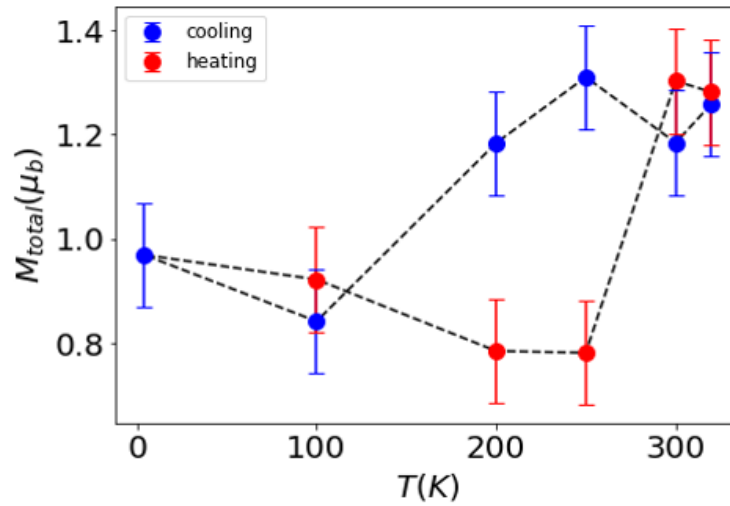

**Fig. S5.** Temperature dependence of the Fe total magnetic moment of the annealed FeRh sample measured from the thermal XMCD evolution at the Fe  $L_3$  edge under 6 T in TFY mode (to compare with Fig. 6c simultaneously measured in TEY mode)
